# Supplementary material for: Multiple Evolutionary Origins of Ubiquitous Cu2+ and Zn2+ Binding in the S100 Protein Family
Source: PubMed Central journal article supplement (PMC5072561; doi:10.1371/journal.pone.0164740), 2016-10-20
Supplement: pone.0164740.s003.pdf [file pone.0164740.s003.pdf]

ES2: Sequence alignment for S100 proteins used in this analysis. Colored characters indicate conservation in the column. Arrows indicate the key residues highlighted in Fig.S1.

Table with 4 columns: Protein Name, Residue 1, Residue 2, Residue 3. The table contains a dense grid of amino acid sequences for various proteins, with specific residues highlighted in different colors (yellow, green, red, blue) to indicate conservation. Arrows at the top point to specific columns of interest.
