# Supplementary material for: Multiple Evolutionary Origins of Ubiquitous Cu2+ and Zn2+ Binding in the S100 Protein Family
Source: PubMed Central journal article supplement (PMC5072561; doi:10.1371/journal.pone.0164740), 2016-10-20
Supplement: pone.0164740.s005.pdf [file pone.0164740.s005.pdf]

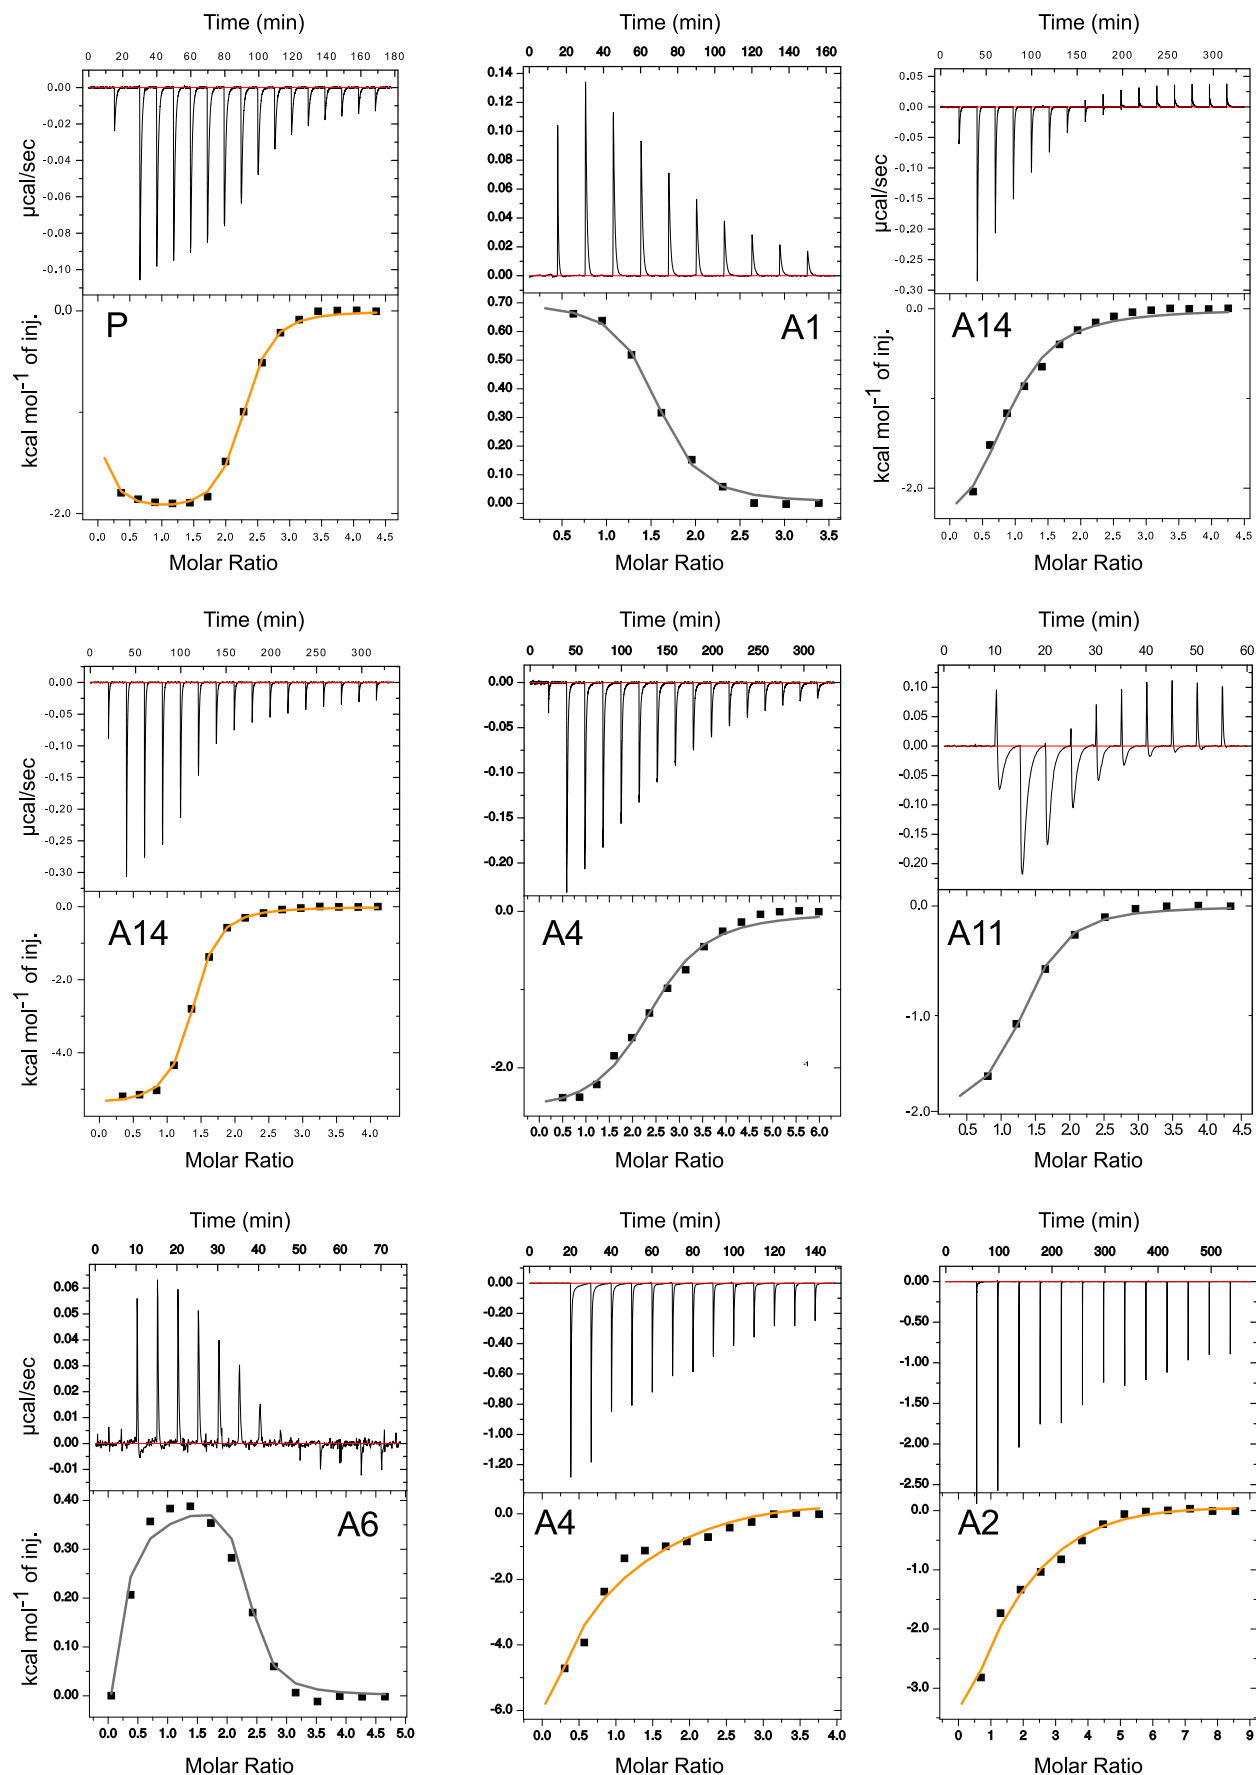

**S4 Fig: Example ITC traces for various S100 proteins.** Each panel is a single human ortholog, indicated by the name on the graph. Color of fit indicates metal used as titrant:  $\text{Zn}^{2+}$  (gray) or  $\text{Cu}^{2+}$  (copper). Top sub-panel for each panel is a raw power vs. time curve. Bottom sub-panel for each panel is integrated heat versus molar ratio. The model fit is denoted by the heavy line through the fit points.
