# Supplementary material for: Multiple Evolutionary Origins of Ubiquitous Cu2+ and Zn2+ Binding in the S100 Protein Family
Source: PubMed Central journal article supplement (PMC5072561; doi:10.1371/journal.pone.0164740), 2016-10-20
Supplement: pone.0164740.s006.pdf [file pone.0164740.s006.pdf]

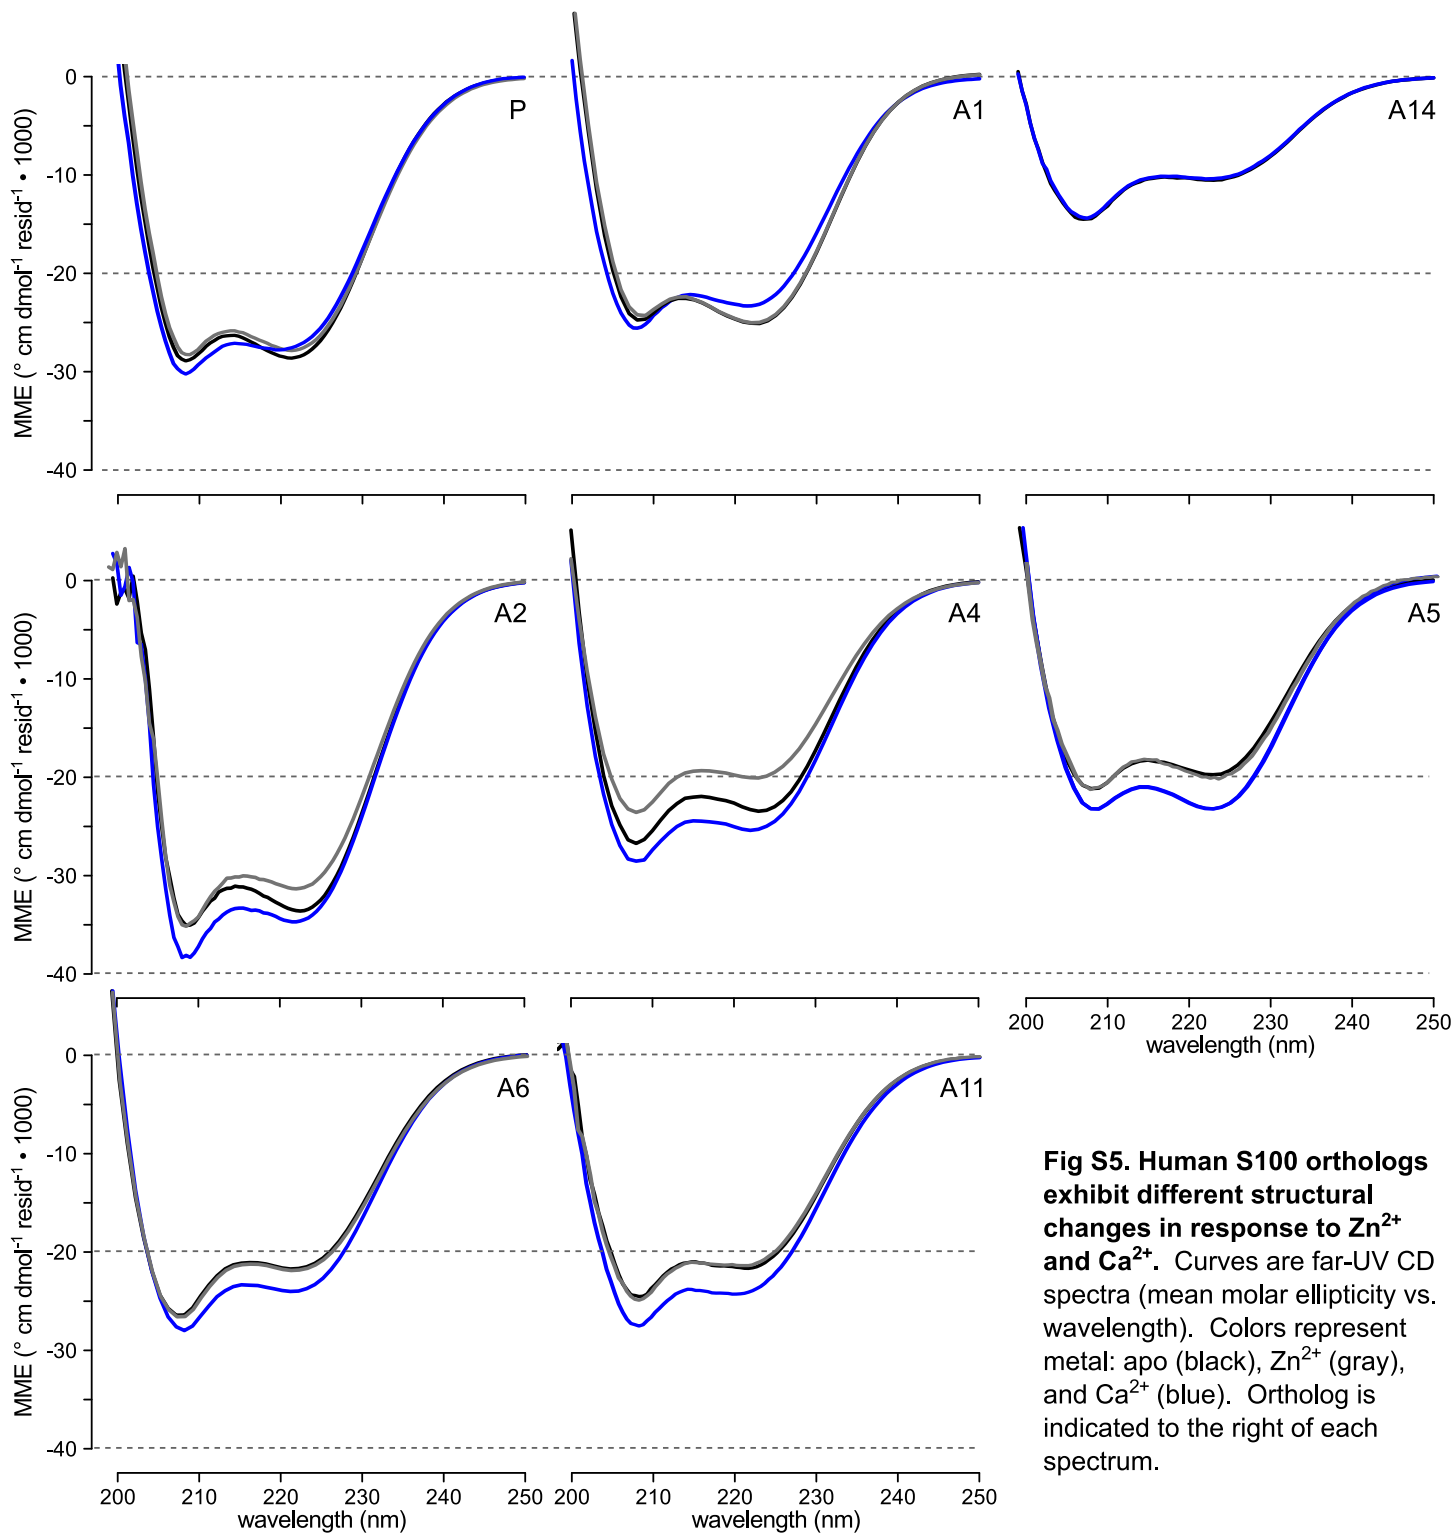

**Fig S5. Human S100 orthologs exhibit different structural changes in response to  $\text{Zn}^{2+}$  and  $\text{Ca}^{2+}$ .** Curves are far-UV CD spectra (mean molar ellipticity vs. wavelength). Colors represent metal: apo (black),  $\text{Zn}^{2+}$  (gray), and  $\text{Ca}^{2+}$  (blue). Ortholog is indicated to the right of each spectrum.
