# Supplementary material for: Multiple Evolutionary Origins of Ubiquitous Cu2+ and Zn2+ Binding in the S100 Protein Family
Source: PubMed Central journal article supplement (PMC5072561; doi:10.1371/journal.pone.0164740), 2016-10-20

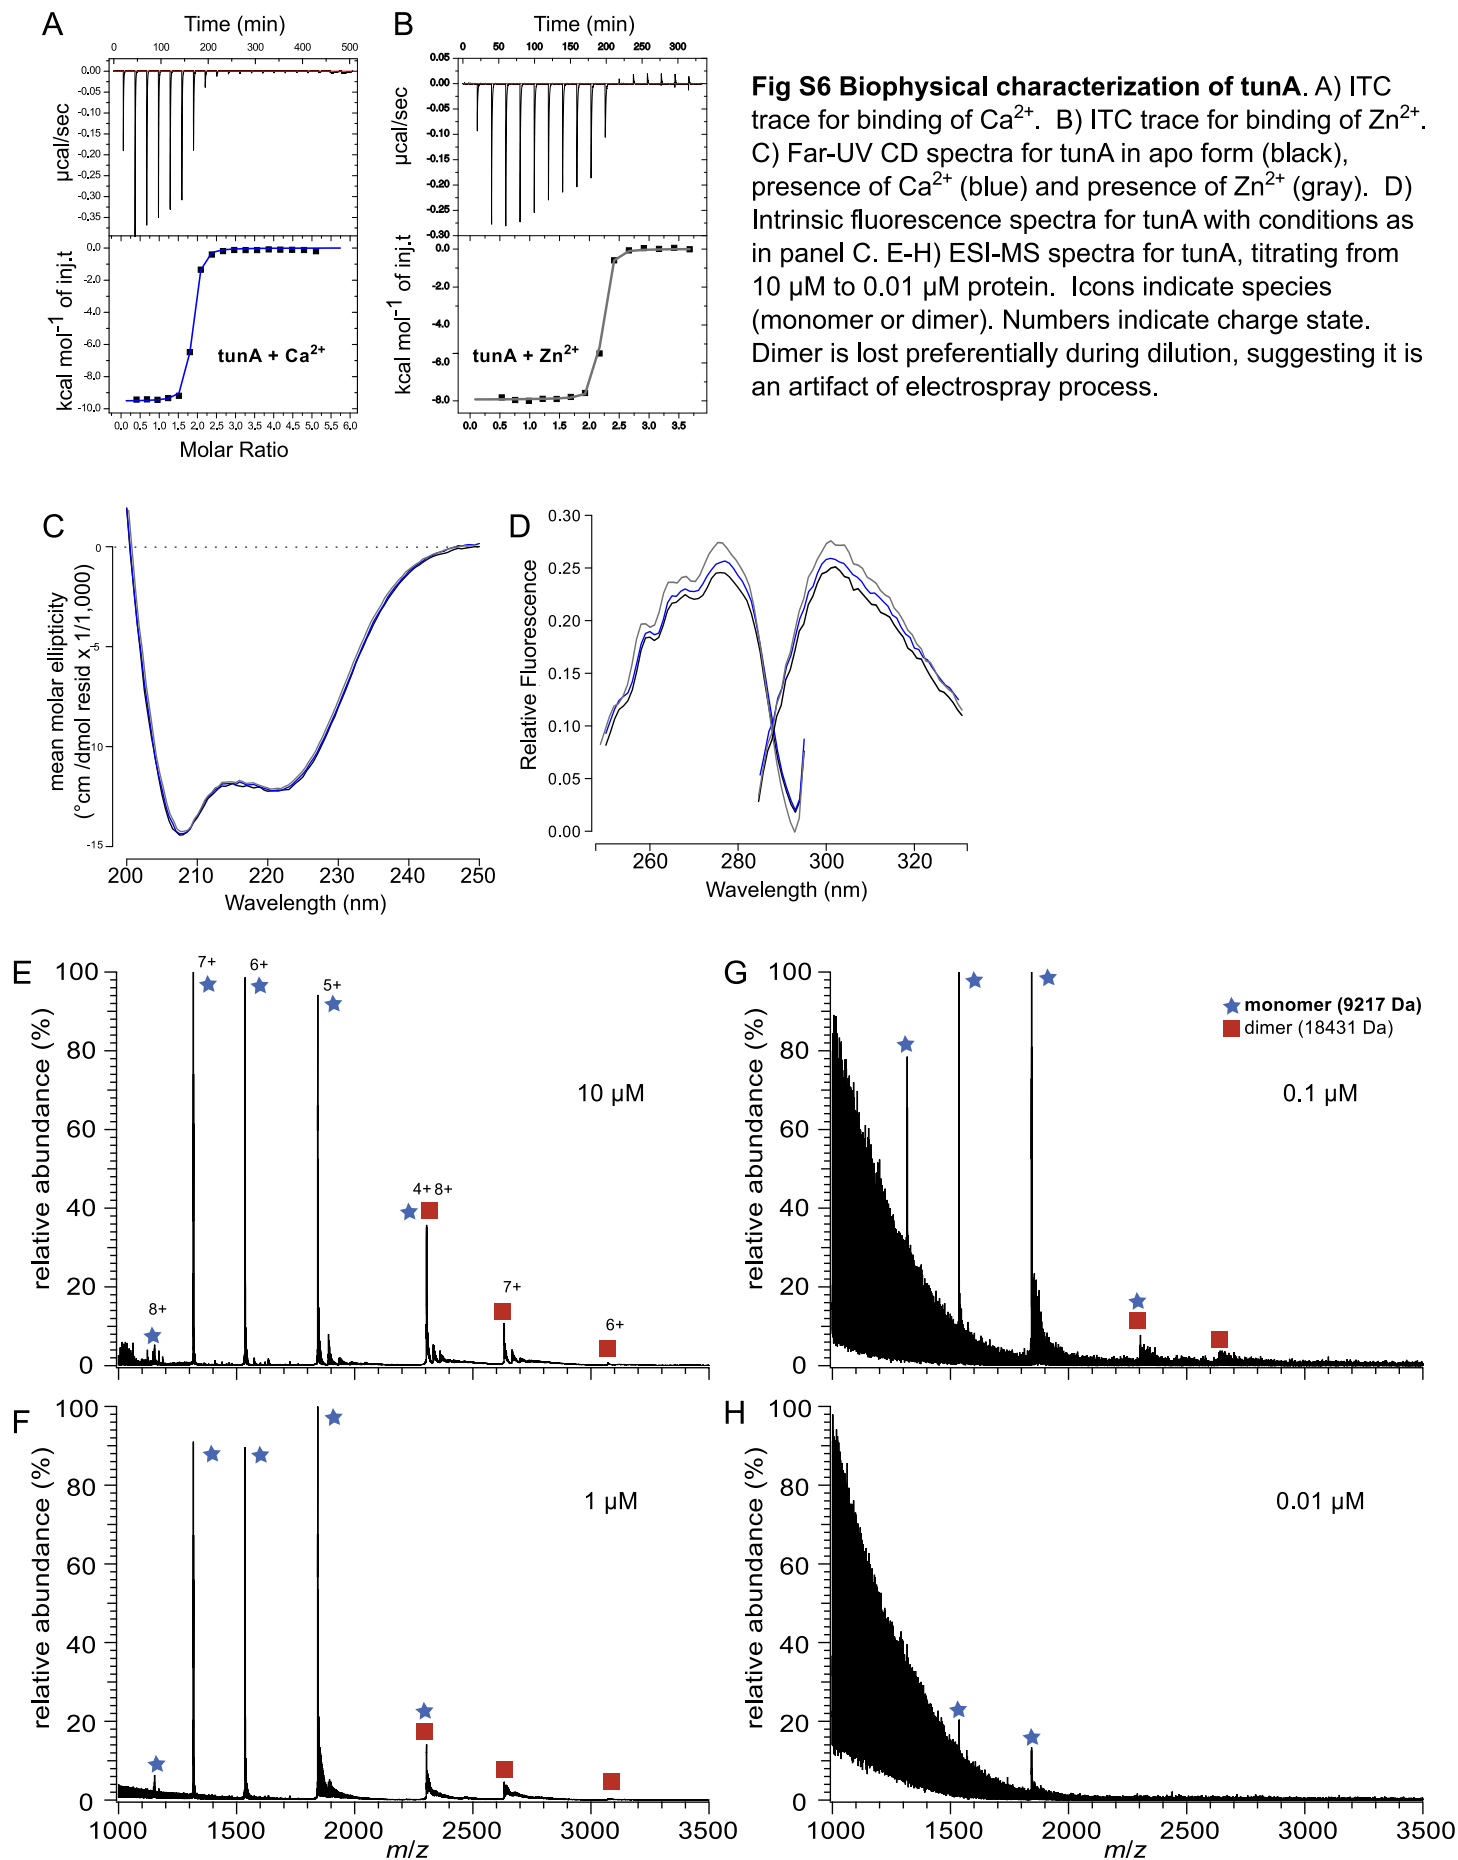

Supplement: pone.0164740.s007.pdf [file pone.0164740.s007.pdf]
