# Supplementary material for: Multiple Evolutionary Origins of Ubiquitous Cu2+ and Zn2+ Binding in the S100 Protein Family
Source: PubMed Central journal article supplement (PMC5072561; doi:10.1371/journal.pone.0164740), 2016-10-20
Supplement: pone.0164740.s008.pdf [file pone.0164740.s008.pdf]

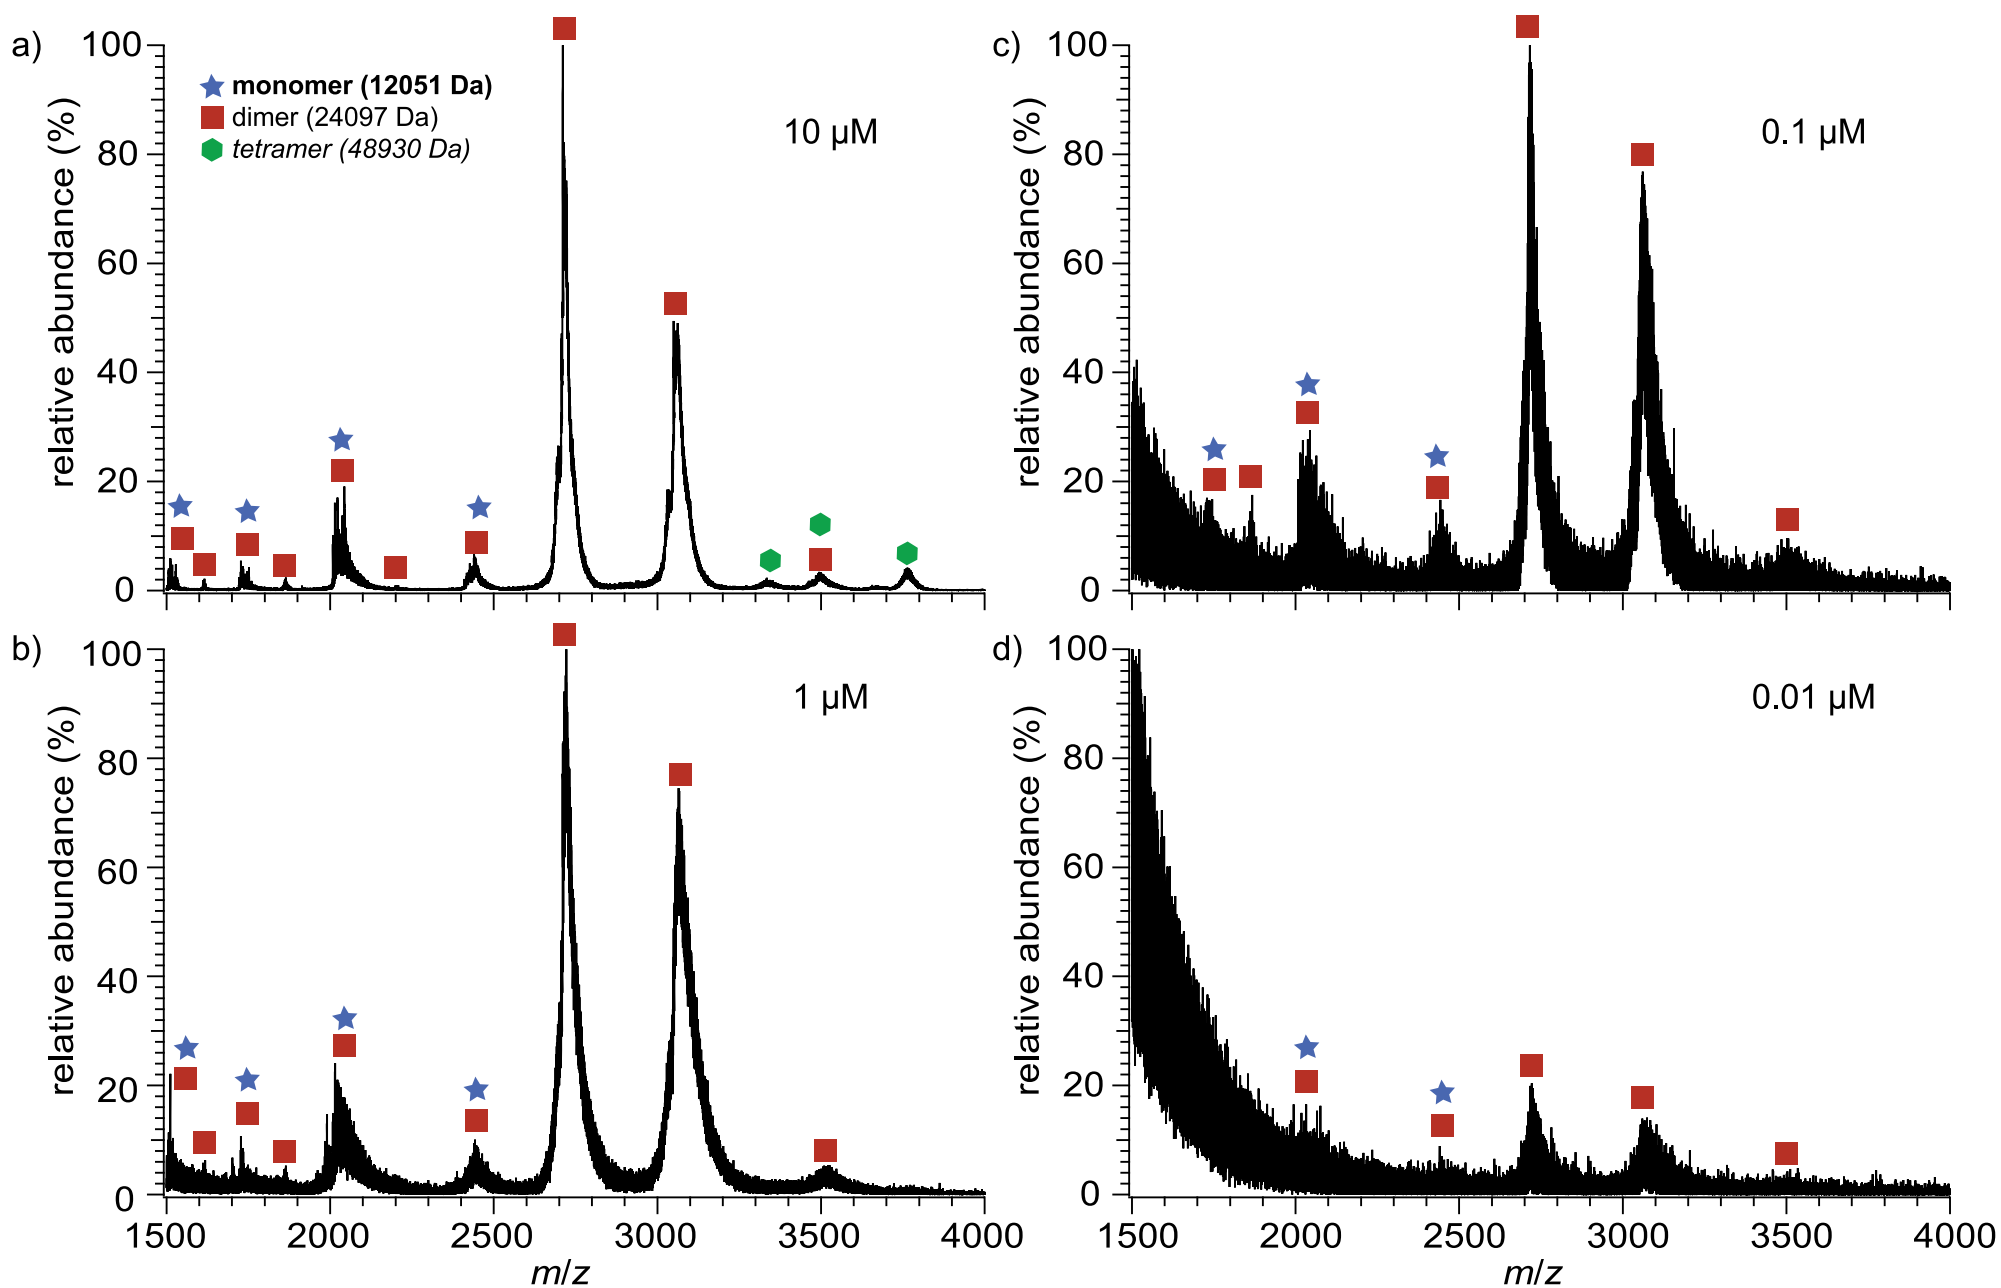

S7 Fig tunB dilution by ESI-MS. tunB mass spectra at concentrations of a) 10  $\mu\text{M}$ , b) 1  $\mu\text{M}$ , c) 0.1  $\mu\text{M}$ , and d) 0.01  $\mu\text{M}$  demonstrate that tunB homodimers are robust to dilution, indicating that this is a specific interaction. Homotetramer is observed only in the most concentrated sample, thus homotetramer signal likely arises from non-specific interactions during the electrospray process.
