# Supplementary material for: Multiple Evolutionary Origins of Ubiquitous Cu2+ and Zn2+ Binding in the S100 Protein Family
Source: PubMed Central journal article supplement (PMC5072561; doi:10.1371/journal.pone.0164740), 2016-10-20
Supplement: pone.0164740.s011.pdf [file pone.0164740.s011.pdf]

**S1 Table: Human S100 sequences used for BLAST**

| uniprot | protein      | protein length | class      | chromosome |
|---------|--------------|----------------|------------|------------|
| P23297  | S100A1       | 94             | S100       | 1          |
| P29034  | S100A2       | 98             | S100       | 1          |
| P33764  | S100A3       | 101            | S100       | 1          |
| P26447  | S100A4       | 101            | S100       | 1          |
| P33763  | S100A5       | 92             | S100       | 1          |
| P06703  | S100A6       | 90             | S100       | 1          |
| P31151  | S100A7       | 101            | S100       | 1          |
| Q86SG5  | S100A7A      | 101            | S100       | 1          |
| P05109  | S100A8       | 93             | S100       | 1          |
| P06702  | S100A9       | 114            | S100       | 1          |
| P60903  | S100A10      | 97             | S100       | 1          |
| P31949  | S100A11      | 105            | S100       | 1          |
| P80511  | S100A12      | 92             | S100       | 1          |
| Q99584  | S100A13      | 98             | S100       | 1          |
| Q9HCY8  | S100A14      | 104            | S100       | 1          |
| Q96FQ6  | S100A16      | 103            | S100       | 1          |
| P04271  | S100B        | 92             | S100       | 21         |
| P29377  | S100G        | 79             | S100       | X          |
| P25815  | S100P        | 95             | S100       | 1          |
| Q8WYG8  | S100Z        | 99             | S100       | 5          |
| Q9UBG3  | Cornulin     | 495            | fused S100 | 1          |
| P20930  | Filaggrin    | 4061           | fused S100 | 1          |
| Q5D862  | Filaggrin-2  | 2391           | fused S100 | 1          |
| Q86YZ3  | Hornerin     | 2850           | fused S100 | 1          |
| Q6XPR3  | Repetin      | 784            | fused S100 | 1          |
| A6NMZ2  | Sentan       | 147            | S100       | 3          |
| Q07283  | Trichohyalin | 1943           | fused S100 | 1          |
