# Supplementary material for: Multiple Evolutionary Origins of Ubiquitous Cu2+ and Zn2+ Binding in the S100 Protein Family
Source: PubMed Central journal article supplement (PMC5072561; doi:10.1371/journal.pone.0164740), 2016-10-20
Supplement: pone.0164740.s012.pdf [file pone.0164740.s012.pdf]

**S2 Table: Sequence sources**

| source                                    | citation             | species                           |
|-------------------------------------------|----------------------|-----------------------------------|
| Uniprot                                   | (Consortium 2015)    | <i>Bos taurus</i>                 |
| Genome                                    |                      | <i>Gallus gallus</i>              |
|                                           |                      | <i>Homo sapiens</i>               |
|                                           |                      | <i>Loxodonta africana</i>         |
|                                           |                      | <i>Monodelphis domestica</i>      |
|                                           |                      | <i>Mus musculus</i>               |
|                                           |                      | <i>Ornithorhynchus anatinus</i>   |
|                                           |                      | <i>Sarcophilus harrisii</i>       |
| Ensembl v.84 predicted peptides           | (Kersey et al. 2016) | <i>Danio rerio</i>                |
| Genome                                    |                      | <i>Gadus morhua</i>               |
|                                           |                      | <i>Gasterosteus aculeatus</i>     |
|                                           |                      | <i>Latimeria chalumnae</i>        |
|                                           |                      | <i>Lepisosteus oculatus</i>       |
|                                           |                      | <i>Macropus eugenii</i>           |
|                                           |                      | <i>Oreochromis niloticus</i>      |
|                                           |                      | <i>Takifugu rubripes</i>          |
| reptilian-transcriptomes.org              | (Tzika et al. 2015)  | <i>Alligator mississippiensis</i> |
| Transcriptome                             |                      | <i>Chalcides ocellatus</i>        |
|                                           |                      | <i>Chamaeleo chamaeleon</i>       |
|                                           |                      | <i>Chrysemys picta</i>            |
|                                           |                      | <i>Crocodylus porosus</i>         |
|                                           |                      | <i>Eublepharis macularius</i>     |
|                                           |                      | <i>Gavialis gangeticus</i>        |
|                                           |                      | <i>Pantherophis guttatus</i>      |
|                                           |                      | <i>Python molurus bivittatus</i>  |
|                                           |                      | <i>Sphenodon punctatus</i>        |
|                                           |                      | <i>Thamnophis elegans</i>         |
| Avianbase                                 | (Eöry et al. 2015)   | <i>Aptenodytes forsteri</i>       |
| Genome                                    |                      | <i>Columba livia</i>              |
| Skatebase                                 | (Wang et al. 2012)   | <i>Callorhynchus milii</i>        |
| Genome                                    |                      | <i>Leucoraja erinacea</i>         |
|                                           |                      | <i>Scyliorhinus canicula</i>      |
| SRA transcriptomes (Leinonen et al. 2011) | SRR1693777           | <i>Acipenser transmontanus</i>    |
|                                           | SRR1604859           | <i>Botryllus schlosseri</i>       |
|                                           | SRR652971            | <i>Ginglymostoma cirratum</i>     |
|                                           | SRR1693776           | <i>Ichthyophis bannanicus</i>     |
|                                           | SRR1693787           | <i>Lepidosiren paradoxa</i>       |
|                                           | SRR1695991           | <i>Lethenteron camtschaticum</i>  |
|                                           | SRR388685            | <i>Petromyzon marinus</i>         |

SRR1612395  
SRR2039259  
SRR2028021  
SRR1514129  
SRR931704

*Polypterus senegalus*  
*Potamotrygon amandae*  
*Protopterus annectens*  
*Scyliorhinus canicula*  
*Tachyglossus aculeatus*

---

|                          |                                                                               |                               |
|--------------------------|-------------------------------------------------------------------------------|-------------------------------|
| Published transcriptomes | (Richards et al. 2013)                                                        | <i>Carcharodon carcharias</i> |
|                          | (Matsunami et al. 2015b, 2015a)                                               | <i>Hynobius retardatus</i>    |
|                          | (Robertson and Cornman 2014, 2013)                                            | <i>Lithobates clamitans</i>   |
|                          | (Qiao et al. 2013)                                                            | <i>Odorrana margaretae</i>    |
|                          | (Wang et al. 2015)                                                            | <i>Oikopleura dioica</i>      |
|                          | (Genomic Resources Development Consortium et al. 2015; Nourisson et al. 2014) | <i>Rhinella marina</i>        |
|                          | (Genomic Resources Development Consortium et al. 2015; Nourisson et al. 2014) | <i>Rhinella schneideri</i>    |
|                          | (Deck et al. 2013)                                                            | <i>Squalus acanthias</i>      |
|                          | (B. Wielstra et al. 2014; Ben Wielstra et al. 2014)                           | <i>Triturus cristatus</i>     |

## Works Cited

- Consortium, T.U. 2015. UniProt: a hub for protein information. *Nucleic Acids Res.* **43**: D204–D212.
- Deck, C.A., McKay, S.J., Fiedler, T.J., LeMoine, C.M.R., Kajimura, M., Nawata, C.M., Wood, C.M., and Walsh, P.J. 2013. Transcriptome responses in the rectal gland of fed and fasted spiny dogfish shark (*Squalus acanthias*) determined by suppression subtractive hybridization. *Comp. Biochem. Physiol. Part D Genomics Proteomics* **8**: 334–343.
- Eöry, L. et al. 2015. Avianbase: a community resource for bird genomics. *Genome Biol.* **16**: 21.
- Genomic Resources Development Consortium et al. 2015. Genomic Resources Notes Accepted 1 August 2014–30 September 2014. *Mol. Ecol. Resour.* **15**: 228–229.
- Kersey, P.J. et al. 2016. Ensembl Genomes 2016: more genomes, more complexity. *Nucleic Acids Res.* **44**: D574–D580.
- Leinonen, R., Sugawara, H., and Shumway, M. 2011. The Sequence Read Archive. *Nucleic Acids Res.* **39**: D19–D21.
- Matsunami, M., Kitano, J., Kishida, O., Michimae, H., Miura, T., and Nishimura, K. 2015a. Data from: Transcriptome analysis of predator- and prey-induced phenotypic plasticity in the Hokkaido salamander (*Hynobius retardatus*). (Accessed July 28, 2016).
- Matsunami, M., Kitano, J., Kishida, O., Michimae, H., Miura, T., and Nishimura, K. 2015b. Transcriptome analysis of predator- and prey-induced phenotypic plasticity in the Hokkaido salamander (*Hynobius retardatus*). *Mol. Ecol.* **24**: 3064–3076.
- Nourisson, C., Carneiro, M., Vallinoto, M., and Sequeira, F. 2014. Data from: “De novo transcriptome assembly and polymorphism detection in ecological important widely distributed Neotropical toads from the *Rhinella marina* species complex (Anura: Bufonidae)” in Genomic Resources Notes Accepted 1 August 2014–30 September 2014. (Accessed July 28, 2016).
- Qiao, L., Yang, W., Fu, J., and Song, Z. 2013. Transcriptome Profile of the Green Odorous Frog (*Odorrana margaretae*). *PLoS ONE* **8**: e75211.
- Richards, V.P., Suzuki, H., Stanhope, M.J., and Shivji, M.S. 2013. Characterization of the heart transcriptome of the white shark (*Carcharodon carcharias*). *BMC Genomics* **14**: 697.
- Robertson, L.S., and Cornman, R.S. 2013. Data from: Transcriptome resources for the frogs *Lithobates clamitans* and *Pseudacris regilla*, emphasizing antimicrobial peptides and conserved loci for phylogenetics. (Accessed July 28, 2016).
- Robertson, L.S., and Cornman, R.S. 2014. Transcriptome resources for the frogs *Lithobates clamitans* and *Pseudacris regilla*, emphasizing antimicrobial peptides and conserved loci for phylogenetics. *Mol. Ecol. Resour.* **14**: 178–183.
- Tzika, A.C., Ullate-Agote, A., Grbic, D., and Milinkovitch, M.C. 2015. Reptilian Transcriptomes v2.0:

An Extensive Resource for Sauropsida Genomics and Transcriptomics. *Genome Biol. Evol.* **7**: 1827–1841.

- Wang, K., Omotezako, T., Kishi, K., Nishida, H., and Onuma, T.A. 2015. Maternal and zygotic transcriptomes in the appendicularian, *Oikopleura dioica*: novel protein-encoding genes, intra-species sequence variations, and trans-spliced RNA leader. *Dev. Genes Evol.* **225**: 149–159.
- Wang, Q. et al. 2012. Community annotation and bioinformatics workforce development in concert—Little Skate Genome Annotation Workshops and Jamborees. *Database J. Biol. Databases Curation* **2012**. <http://www.ncbi.nlm.nih.gov/pmc/articles/PMC3308154/> (Accessed July 28, 2016).
- Wielstra, B., Duijm, E., Lagler, P., Lammers, Y., Meilink, W.R.M., Ziermann, J.M., and Arntzen, J.W. 2014. Data from: Parallel tagged amplicon sequencing of transcriptome-based genetic markers for *Triturus newts* with the Ion Torrent next-generation sequencing platform. (Accessed July 28, 2016).
- Wielstra, B., Duijm, E., Lagler, P., Lammers, Y., Meilink, W.R.M., Ziermann, J.M., and Arntzen, J.W. 2014. Parallel tagged amplicon sequencing of transcriptome-based genetic markers for *Triturus newts* with the Ion Torrent next-generation sequencing platform. *Mol. Ecol. Resour.* **14**: 1080–1089.
