# Supplementary material for: Multiple Evolutionary Origins of Ubiquitous Cu2+ and Zn2+ Binding in the S100 Protein Family
Source: PubMed Central journal article supplement (PMC5072561; doi:10.1371/journal.pone.0164740), 2016-10-20
Supplement: pone.0164740.s013.pdf [file pone.0164740.s013.pdf]

|                  | homolog                 | $K_{D,1}$<br>( $\mu\text{M}$ ) | $\Delta H_1$<br>( $\text{kcal}\cdot\text{mol}^{-1}$ ) | $n$<br>(#)           | $K_{D,2}$<br>( $\mu\text{M}$ ) | $\Delta H_2$<br>( $\text{kcal}\cdot\text{mol}^{-1}$ ) | fit model         | buffer | # reps |
|------------------|-------------------------|--------------------------------|-------------------------------------------------------|----------------------|--------------------------------|-------------------------------------------------------|-------------------|--------|--------|
| $\text{Zn}^{2+}$ | P                       | $2.7 \pm \text{n/a}$           | $-0.4 \pm \text{n/a}$                                 | $0.7 \pm \text{n/a}$ | ---                            | ---                                                   | equivalent sites  | Tris   | 1      |
|                  | A1                      | $3.5 \pm 0.7$                  | $0.8 \pm 0.1$                                         | $1.3 \pm 0.2$        | ---                            | ---                                                   | equivalent sites  | TES    | 2      |
|                  | A14                     | $27.9 \pm 12.6$                | $-2.3 \pm 0.5$                                        | $1.0 \pm 0.2$        | ---                            | ---                                                   | equivalent sites  | Tris   | 2      |
|                  | A2                      | $33.2 \pm 2.3$                 | $6.1 \pm 1.4$                                         | $2 \pm \text{n/a}$   | $83.4 \pm 2.1$                 | $-9.1 \pm 1.1$                                        | independent sites | Tris   | 2      |
|                  | A4                      | $12.5 \pm 1.3$                 | $-4.9 \pm 2.3$                                        | $2.2 \pm 0.1$        | **                             | **                                                    | equivalent sites  | Tris   | 2      |
|                  | A5                      | $1.3 \pm 0.3$                  | $-1.4 \pm 0.4$                                        | $0.9 \pm 0.1$        | ---                            | ---                                                   | equivalent sites  | Tris   | 2      |
|                  | A5 <sub>H17A</sub>      | $3.0 \pm 0.1$                  | $-2.5 \pm 0.2$                                        | $0.8 \pm 0.1$        | ---                            | ---                                                   | equivalent sites  | Tris   | 2      |
|                  | A5 <sub>C79S</sub>      | ---                            | ---                                                   | ---                  | ---                            | ---                                                   | equivalent sites  | Tris   | 2      |
|                  | A5 <sub>C43S/C79S</sub> | ---                            | ---                                                   | ---                  | ---                            | ---                                                   | equivalent sites  | Tris   | 2      |
|                  | A6                      | **                             | **                                                    | **                   | **                             | **                                                    | **                | Tris   | 2      |
|                  | A11                     | $10.9 \pm 0.3$                 | $-2.0 \pm 0.1$                                        | $1.2 \pm 0.1$        | ---                            | ---                                                   | equivalent sites  | Tris   | 2      |
|                  | tunA                    | $0.1 \pm 0.1$                  | $-7.4 \pm 0.5$                                        | $2.0 \pm 0.1$        | **                             | **                                                    | equivalent sites  | TES    | 2      |
| tunB             | $2.6 \pm \text{n/a}$    | $8.2 \pm \text{n/a}$           | $1.1 \pm \text{n/a}$                                  | ---                  | ---                            | equivalent sites                                      | TES               | 1      |        |
| $\text{Cu}^{2+}$ | P                       | $1.7 \pm 0.8$                  | $-2.4 \pm 0.3$                                        | $2.1 \pm 0.1$        | **                             | **                                                    | equivalent sites  | TES    | 2      |
|                  | A1                      | ---                            | ---                                                   | ---                  | ---                            | ---                                                   | ---               | TES    | 2      |
|                  | A14                     | $1.1 \pm 0.3$                  | $-5.2 \pm 0.2$                                        | $1.5 \pm 0.2$        | ---                            | ---                                                   | equivalent sites  | TES    | 2      |
|                  | A2                      | **                             | **                                                    | $2 \pm \text{n/a}$   | **                             | **                                                    | **                | TES    | 2      |
|                  | A4                      | **                             | **                                                    | $2 \pm \text{n/a}$   | **                             | **                                                    | **                | TES    | 2      |
|                  | A5                      | $1.2 \pm 0.1$                  | $-3.6 \pm 0.2$                                        | $1.2 \pm 0.1$        | ---                            | ---                                                   | equivalent sites  | TES    | 2      |
|                  | A5 <sub>H17A</sub>      | $2.9 \pm 1.2$                  | $-4.3 \pm 0.6$                                        | $1.1 \pm 1.4$        | ---                            | ---                                                   | equivalent sites  | TES    | 2      |
|                  | A5 <sub>C79S</sub>      | $6.4 \pm 0.2$                  | $-3.1 \pm 0.1$                                        | $0.9 \pm 0.1$        | ---                            | ---                                                   | equivalent sites  | TES    | 2      |
|                  | A5 <sub>C43S/C79S</sub> | $2.4 \pm 0.6$                  | $-2.6 \pm 0.2$                                        | $1.2 \pm 0.1$        | ---                            | ---                                                   | equivalent sites  | TES    | 2      |
|                  | A6                      | $1.9 \pm 0.5$                  | $-3.6 \pm 0.3$                                        | $0.8 \pm 0.1$        | ---                            | ---                                                   | equivalent sites  | TES    | 2      |
| A11              | $2.1 \pm 0.1$           | $-5.4 \pm 0.2$                 | $2.4 \pm 0.1$                                         | ---                  | ---                            | equivalent sites                                      | TES               | 2      |        |
| $\text{Ca}^{2+}$ | tunA                    | $0.1 \pm 0.1$                  | $-9.5 \pm 1.6$                                        | $2.1 \pm 0.2$        | **                             | **                                                    | equivalent sites  | TES    | 2      |
|                  | tunB                    | $1.6 \pm 0.3$                  | $246 \pm 86$                                          | $1.8 \pm 0.2$        | $1.6 \pm 0.3$                  | $-133 \pm 61$                                         | equivalent sites  | TES    | 2      |
